# Supplementary material for: A regularized limited memory BFGS method for large-scale unconstrained optimization and its efficient implementations
Source: Springer Nature journal article supplement (doi:10.1007/s10589-022-00351-5), 2022-02-22
Supplement: 10589_2022_351_MOESM1_ESM.pdf [file 10589_2022_351_MOESM1_ESM.pdf]

### Supplementary information

We analyzed following 297 test problems from the CUTEst.

**Table 7.1:** 297 Test functions [8]

| Problem  | Name | Dim.     | Problem | Name     | Dim. |
|----------|------|----------|---------|----------|------|
| BQP1VAR  | 1    | OSLBQP   | 8       | SPMSRTL5 | 4999 |
| AKIVA    | 2    | PALMER4E | 8       | ARWHEAD  | 5000 |
| BEALE    | 2    | PALMER5E | 8       | BDEXP    | 5000 |
| BRKMCC   | 2    | PALMER6E | 8       | BDQRTIC  | 5000 |
| BROWNB5  | 2    | PALMER7E | 8       | BROYDN7D | 5000 |
| CAMEL6   | 2    | PALMER8E | 8       | BRYBND   | 5000 |
| CLIFF    | 2    | HEART8LS | 8       | CHENHARK | 5000 |
| CUBE     | 2    | PALMER2C | 8       | CRAGGLVY | 5000 |
| DENSCHNA | 2    | PALMER2E | 8       | DQDRTIC  | 5000 |
| DENSCHNB | 2    | PALMER5A | 8       | DQRTIC   | 5000 |
| DENSCHNC | 2    | PALMER6C | 8       | ENGVAL1  | 5000 |
| DENSCHNF | 2    | PALMER7C | 8       | FLETBV3M | 5000 |
| EXPFIT   | 2    | PALMER4C | 8       | FLETGBV2 | 5000 |
| HILBERTA | 2    | PALMER8C | 8       | FLETCHBV | 5000 |
| HIMMELBB | 2    | PALMER1C | 8       | FREUROTH | 5000 |
| HIMMELBG | 2    | VIBRBEAM | 8       | INDEF    | 5000 |
| HIMMELBH | 2    | S368     | 8       | LIARWHD  | 5000 |
| HS1      | 2    | MAXLIKA  | 8       | MCCORMCK | 5000 |
| HS2      | 2    | PALMER5B | 9       | MOREBV   | 5000 |
| HS3      | 2    | SPECAN   | 9       | NCB20B   | 5000 |
| HS3MOD   | 2    | HILBERTB | 10      | NONCVXU2 | 5000 |
| HS5      | 2    | HS110    | 10      | NONCVXUN | 5000 |
| HUMPS    | 2    | OSCIPATH | 10      | NONDIA   | 5000 |
| JENSMP   | 2    | SSCOSINE | 10      | NONDQUAR | 5000 |
| 22       |      |          |         |          |      |
| LOGHAIRY | 2    | STRATEC  | 10      | NONSCOMP | 5000 |
| LOGROS   | 2    | OSBORNEB | 11      | PENTDI   | 5000 |
| MARATOSB | 2    | WATSON   | 12      | POWELLSG | 5000 |
| MEXHAT   | 2    | DIXMAANM | 15      | QUARTC   | 5000 |
| ROSENBR  | 2    | DIXMAANN | 15      | SCHMVETT | 5000 |
| S308     | 2    | DIXMAANO | 15      | SINQUAD  | 5000 |
| SIM2BQP  | 2    | DIXMAANP | 15      | SPARSINE | 5000 |
| SIMBQP   | 2    | PARKCH   | 15      | SROSENBR | 5000 |
| SINEVAL  | 2    | HATFLDC  | 25      | SBRYBND  | 5000 |
| SISSER   | 2    | 3PK      | 30      | TOINTGSS | 5000 |
| SNAIL    | 2    | BQPGABIM | 50      | TQUARTIC | 5000 |
| ZANGWIL2 | 2    | BQPGASIM | 50      | TRIDIA   | 5000 |
| HIMMELP1 | 2    | CHNROSNB | 50      | TESTQUAD | 5000 |
| HAIRY    | 2    | CHNRSNBM | 50      | QRTQUAD  | 5000 |
| DJTL     | 2    | ERRINROS | 50      | GENHUMPS | 5000 |
| MDHOLE   | 2    | ERRINRSM | 50      | SBRYBND  | 5000 |
| HS4      | 2    | TOINTGOR | 50      | SCOSINE  | 5000 |
| BARD     | 3    | TOINTPSP | 50      | QUDLIN   | 5000 |
| BOX2     | 3    | TOINTQOR | 50      | SCOND1LS | 5002 |
| BOX3     | 3    | VAREIGVL | 50      | BRATU1D  | 5005 |
| DENSCHND | 3    | DECONVB  | 63      | NCB20    | 5010 |
| ENGVAL2  | 3    | DECONVU  | 63      | CLPLATEA | 5041 |
| GULF     | 3    | MINSURF  | 64      | CLPLATEB | 5041 |
| HATFLDD  | 3    | HYDC20LS | 99      | CLPLATEC | 5041 |
| HATFLDE  | 3    | MANCINO  | 100     | MINSURFO | 5306 |
| HATFLDFL | 3    | SENSORS  | 100     | NOBNDTOR | 5476 |
| HELIX    | 3    | CHEBYQAD | 100     | ODC      | 5476 |
| HS25     | 3    | HOLMES   | 180     | TORSION3 | 5476 |
| KOEBHEL5 | 3    | ARGLINA  | 200     | TORSION4 | 5476 |

|          |   |          |      |          |          |
|----------|---|----------|------|----------|----------|
| PFIT1LS  | 3 | BROWNAL  | 200  | TORSION1 | 5476     |
| PFIT2LS  | 3 | PENALTY3 | 200  | TORSION2 | 5476     |
| PFIT4LS  | 3 | VARDIM   | 200  | TORSION5 | 5476     |
| YFIT     | 3 | ARGLINC  | 200  | TORSION6 | 5476     |
| YFITU    | 3 | HADAMALS | 400  | TORSIONA | 5476     |
| WEEDS    | 3 | GENROSE  | 500  | TORSIONB | 5476     |
| EG1      | 3 | PROBPENL | 500  | TORSIONC | 5476     |
| MEYER3   | 3 | QR3DLS   | 610  | TORSIOND | 5476     |
| DENSCHNE | 3 | EXTROSNB | 1000 | TORSIONE | 5476     |
| GROWTHLS | 3 | FLETCHCR | 1000 | TORSIONF | 5476     |
| HIELOW   | 3 | PENALTY1 | 1000 | SSC      | 5476     |
| PFIT3LS  | 3 | EG2      | 1000 | FMINSURF | 5625     |
| ALLINIT  | 4 | SINEALI  | 1000 | NLMSURF  | 5625     |
| ALLINITU | 4 | HARKERP2 | 1000 | FMINSRF2 | 5625     |
| BROWNDEN | 4 | POWELLBC | 1000 | LMINSURF | 5625     |
| HIMMELBF | 4 | MSQRTALS | 1024 | WALL20   | 5924     |
| HS38     | 4 | MSQRTBLS | 1024 | GRIDGENA | 6218     |
| KOWOSB   | 4 | EXPLIN   | 1200 | BOX      | 10000    |
| PALMER1  | 4 | EXPQUAD  | 1200 | COSINE   | 10000    |
| PALMER2  | 4 | LINVERSE | 1999 | DIXON3DQ | 10000    |
| PALMER3  | 4 | CHARDIS0 | 2000 | JNLBRNG1 | 10000    |
| PALMER3B | 4 | EDENSCH  | 2000 | JNLBRNG2 | 10000    |
| PALMER4  | 4 | BQPGAUSS | 2003 | JNLBRNGA | 10000    |
| 23       |   |          |      |          |          |
| PALMER4B | 4 | RAYBENDS | 2050 | JNLBRNGB | 10000    |
| PALMER5D | 4 | RAYBENDL | 2050 | SPARSQUR | 10000    |
| PSPDOC   | 4 | EIGENALS | 2550 | POWER    | 10000    |
| PALMER2B | 4 | EIGENBLS | 2550 | OBSTCLAE | 10000    |
| PALMER1B | 4 | EIGENCLS | 2652 | OBSTCLAL | 10000    |
| HATFLDA  | 4 | DIXMAANA | 3000 | OBSTCLBL | 10000    |
| HATFLDB  | 4 | DIXMAANB | 3000 | OBSTCLBM | 10000    |
| OSBORNEA | 5 | DIXMAANC | 3000 | OBSTCLBU | 10000    |
| HS45     | 5 | DIXMAAND | 3000 | CURLY10  | 10000    |
| BIGGS3   | 6 | DIXMAANE | 3000 | CURLY20  | 10000    |
| BIGGS5   | 6 | DIXMAANF | 3000 | CURLY30  | 10000    |
| HART6    | 6 | DIXMAANG | 3000 | CVXBQP1  | 10000    |
| PALMER2A | 6 | DIXMAANH | 3000 | SCURLY10 | 10000    |
| PALMER3A | 6 | DIXMAANI | 3000 | SCURLY20 | 10000    |
| PALMER4A | 6 | DIXMAANJ | 3000 | SCURLY30 | 10000    |
| PALMER5C | 6 | DIXMAANK | 3000 | BOXPOWER | 20000    |
| PALMER6A | 6 | DIXMAANL | 3000 | MODBEALE | 20000    |
| PALMER7A | 6 | JIMACK   | 3549 | WALL50   | 37311    |
| PALMER8A | 6 | WOODS    | 4000 | DEGDIAG  | 1.00E+05 |
| PALMER1A | 6 | CHAINWOO | 4000 | DEGTRID  | 1.00E+05 |
| HEART6LS | 6 | DRCV1LQ  | 4624 | DEGTRID2 | 1.00E+05 |
| PALMER1D | 7 | DRCV2LQ  | 4624 | OSCIGRAD | 1.00E+05 |
| AIRCRFTB | 8 | DRCV3LQ  | 4624 | INDEFM   | 1.00E+05 |
